# Supplementary material for: Cauliflower mosaic virus P6 Dysfunctions Histone Deacetylase HD2C to Promote Virus Infection
Source: MDPI journal article supplement (doi:10.3390/cells10092278), 2021-09-01
Supplement: s1 [file s1]

Supplementary Tables:

**Table S1.** Primers used for RT-PCR analysis

| <b>Genes</b>  | <b>Primers</b>                            |
|---------------|-------------------------------------------|
| <i>ABI1</i>   | F: 5' – GCCATGTCTGAGATCCATTGG – 3'        |
|               | R: 5' – AACGATGCATCCCCAGCCAC – 3'         |
| <i>ABI2</i>   | F: 5' – CAAGATCCATTGGCGATAGATACC – 3'     |
|               | R: 5' – CCTCTTTTCTCCGCCGGAAG – 3'         |
| <i>AtERF4</i> | F: 5' – CGGCTACTACTAACCAGACCC – 3'        |
|               | R: 5' – TCGCTGAAGGCACAATAA – 3'           |
| P1            | F: 5' – TTCAAGAAATTGGAAATGTCCAGCA – 3'    |
|               | R: 5' – GGATTGGGTTTTAGCTCCTAATAAGGC – 3'  |
| P3            | F: 5' – GCTTAGAAGCCGTTGCAGCGA – 3'        |
|               | R: 5' – TCCTACGCCGTAATTGGGGTAAG – 3'      |
| P5            | F: 5' – GTGCAATCAACATGGAATCATTCTTTC – 3'  |
|               | R: 5' – TTGAGGCTTGTGTGTTTCCTTCATCTAT – 3' |
| P6            | F: 5' – GGATCTAACAGAACTCGCCGTGAA – 3'     |
|               | R: 5' – GAGTGTCGTGCTCCACCATGTTG – 3'      |
| <i>ACTIN2</i> | F: 5' – GCCATCCAAGCTGTTCTCTC – 3'         |
|               | R: 5' – GCTCGTAGTCAACAGCAACAA – 3'        |

**Table S2.** Primers used for ChIP assay

| Genes            | Primers                                       |
|------------------|-----------------------------------------------|
| <i>ABI1</i> -P   | F: 5' – GATATTTTACCGGTGGTC – 3'               |
|                  | R: 5' – GACGTGTCGTAGTCCGAGTT – 3'             |
| <i>ABI1</i> -E   | F: 5' – CTTGTCTTCCTAGCTTCTTC – 3'             |
|                  | R: 5' – CCTTTACCCAATCTGATCCC – 3'             |
| <i>ABI2</i> -P   | F: 5' – CTAGTGTGGTCAGTGTAGATG – 3'            |
|                  | R: 5' – GTGTAACATGCCATATGTCAC – 3'            |
| <i>ABI2</i> -E   | F: 5' – CTCTCCTTTCTCTTCCCAAC – 3'             |
|                  | R: 5' – GAGGGTCAGTGAATGGTCTG – 3'             |
| <i>AtERF4</i> -P | F: 5' – GTGTACTCACTAGAGCAAGC – 3'             |
|                  | R: 5' – CCGTACAGTATTTGACGC – 3'               |
| <i>AtERF4</i> -E | F: 5' – ACCATTTCAGGCTTTGAC – 3'               |
|                  | R: 5' – AACGCCTCTGTAACGAA – 3'                |
| p1               | F: 5' – GATTCCATTGCCCAGCTATCTGTCA – 3'        |
|                  | R: 5' – GCATCTTGAACGATAGCCTTTCCTT – 3'        |
| p2               | F: 5' – GATTGATGTGATATCTCCACTGACGTAAGG – 3'   |
|                  | R: 5' – GCGTGTCTCTCCAAATGAAATGAA – 3'         |
| p3               | F: 5' – GTTTCGCTCACGTGTTGAGCATATAAGAAA – 3'   |
|                  | R: 5' – CTGGATTTTAGTACTGGATTTTGGTTTATAGG – 3' |
| p4               | F: 5' – TAGGCAGGAGGCCGTTAGGGAAG – 3'          |
|                  | R: 5' – CTCCTTCCTTCCGTCCACTTTATCA – 3'        |
| p5               | F: 5' – GAAACATCAGATGGCAAGCATGGCT – 3'        |
|                  | R: 5' – TGAAAGGAAGTCCGCAAAGTGGTTG – 3'        |
| p6               | F: 5' – ACACATCTCTGGAGACTGAGAAAATCAGA – 3'    |
|                  | R: 5' – GCTAAGCTTATTTTGTCTTACTAGATCGAG – 3'   |
| <i>ACTIN7</i>    | F: 5' – GGAAACATCGTTCTCAGTGGT – 3'            |
|                  | R: 5' – CTTGATCTTCATGCTGCTAGGT – 3'           |
